# Supplementary material for: Genome sequencing and analysis of Talaromyces pinophilus provide insights into biotechnological applications
Source: PubMed Central journal article supplement (PMC5428652; doi:10.1038/s41598-017-00567-0), 2017-03-28
Supplement: 41598_2017_567_MOESM1_ESM.pdf [file 41598_2017_567_MOESM1_ESM.pdf]

## Supplementary Information

### **Genome sequencing and analysis of *Talaromyces pinophilus* provide insights into biotechnological applications**

Cheng-Xi Li<sup>†</sup>, Shuai Zhao<sup>†</sup>, Ting Zhang, Liang Xian, Lu-Sheng Liao, Jun-Liang Liu, Jia-Xun Feng\*

State Key Laboratory for Conservation and Utilization of Subtropical Agro-bioresources, College of Life Science and Technology, Guangxi University, 100 Daxue Road, Nanning, Guangxi 530004, People's Republic of China.

\*Corresponding author. E-mail address: [jiaxunfeng@sohu.com](mailto:jiaxunfeng@sohu.com) (J.-X. Feng)

<sup>†</sup>These authors contributed equally to this work.

**Supplementary files provided with this submission:**

**Figure S1.** Venn diagram showing the unique and shared proteins in *T. pinophilus* 1-95 annotated using the Non-redundant (NR), UniProt, Kyoto Encyclopaedia of Genes and Genomes (KEGG), the Clusters of Orthologous Groups of proteins (COG) and Gene Ontology (GO) databases.

**Figure S2.** Functional annotation of proteins as determined using the Gene Ontology (GO) database, and comparative analysis of the identified proteins in *T. pinophilus* 1-95 and *T. cellulolyticus* Y-94.

**Figure S3.** Functional annotation of the secreted proteins of *T. pinophilus* 1-95 using the Kyoto Encyclopaedia of Genes and Genomes (KEGG) database.

**Table S1.** Comparison analysis of genome features among *T. pinophilus* 1-95 and another 10 filamentous fungi producing biomass degrading enzymes.

**Table S2.** Assessment analysis of *T. pinophilus* 1-95 genome by software CEGMA and BUSCO.

**Table S3.** Comparative analysis of homologous proteins among *T. pinophilus* 1-95 and another 10 filamentous fungi producing biomass degrading enzymes.

**Table S4.** Paired-end (PE) libraries with average insert sizes 500 bp mapped the whole genome sequence of *Talaromyces cellulolyticus* Y-94.

**Table S5.** Comparison of plant cell wall degrading enzymes (CWDEs) among *T. pinophilus* 1-95, *T. cellulolyticus* Y-94 and *Penicillium oxalicum* HP7-1.

**Table S6.** Comparison of starch degrading enzymes among *T. pinophilus* 1-95 and another 10 filamentous fungi producing biomass degrading enzymes.

**Table S7.** The predicted secondary metabolism gene clusters in *T. pinophilus* 1-95 and the comparison analysis among with another 10 filamentous fungi producing biomass degrading enzymes.

**Dataset S1.** Orthologs used for the construction of phylogenetic tree among *Talaromyces pinophilus* 1-95 and another 10 filamentous fungi producing biomass degrading enzymes.

**Dataset S2.** The putative transporters in *Talaromyces pinophilus* 1-95.

**Dataset S3.** The secretome of *Talaromyces pinophilus* 1-95 and function annotation

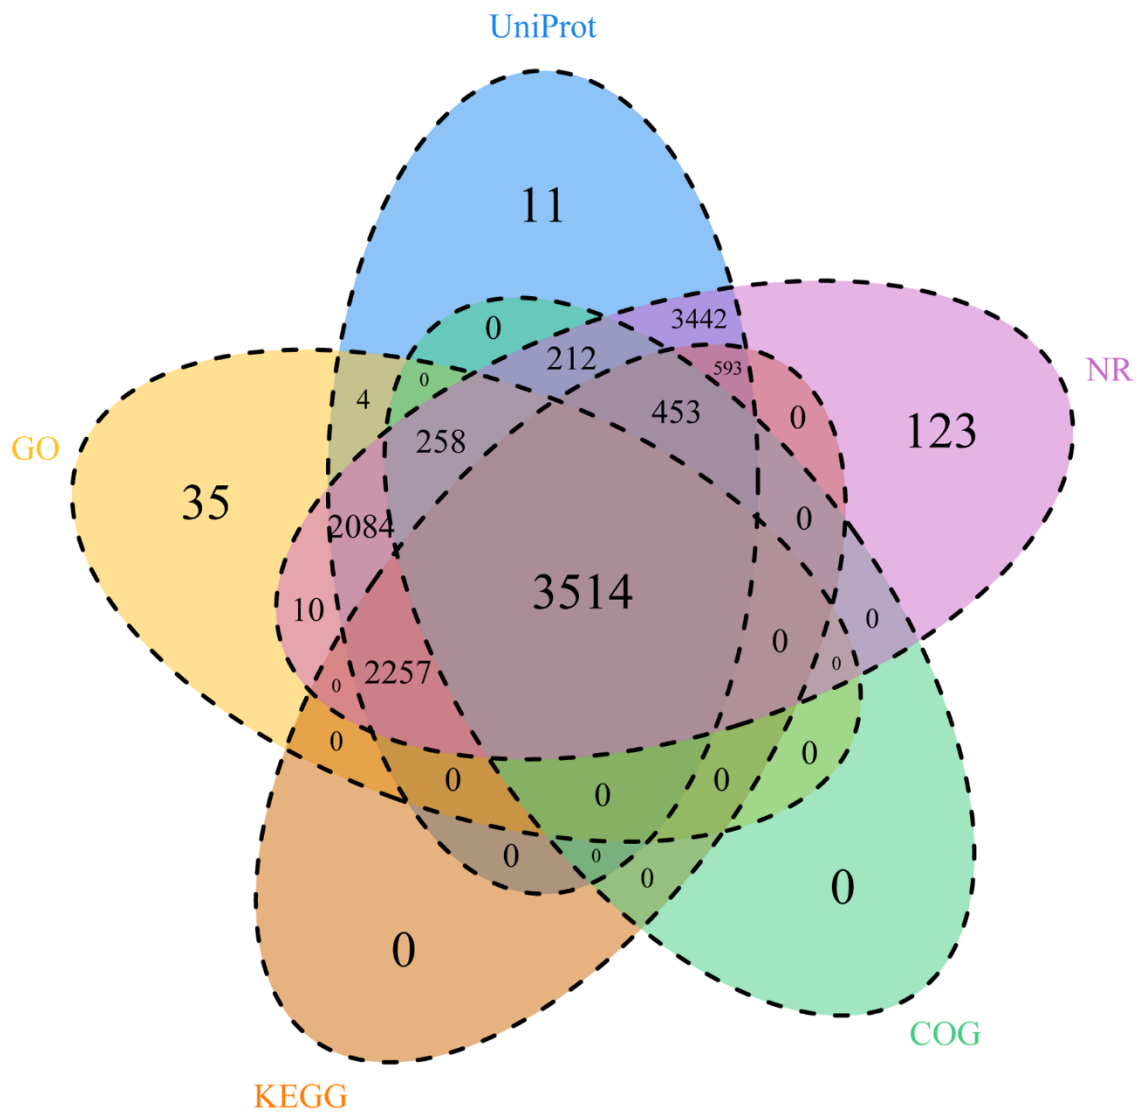

**Supplementary Figure S1.** Venn diagram showing the unique and shared proteins in *T. pinophilus* 1-95 annotated using the Non-redundant (NR), UniProt, Kyoto Encyclopaedia of Genes and Genomes (KEGG), the Clusters of Orthologous Groups of proteins (COG) and Gene Ontology (GO) databases.

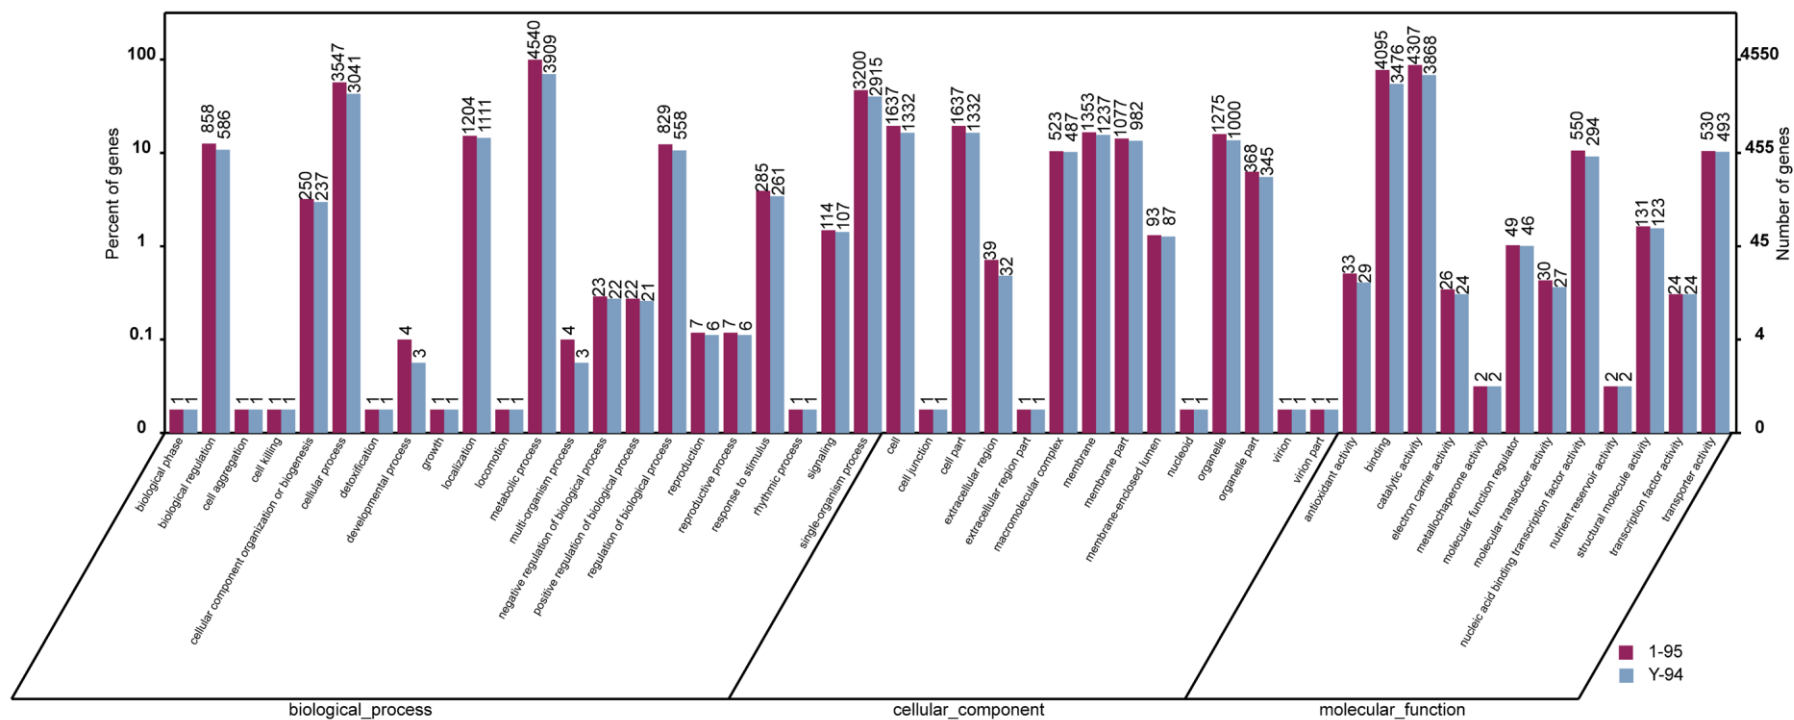

**Supplementary Figure S2.** Functional annotation of proteins as determined using the Gene Ontology (GO) database, and comparative analysis of the identified proteins in *T. pinophilus* 1-95 and *T. cellulolyticus* Y-94.

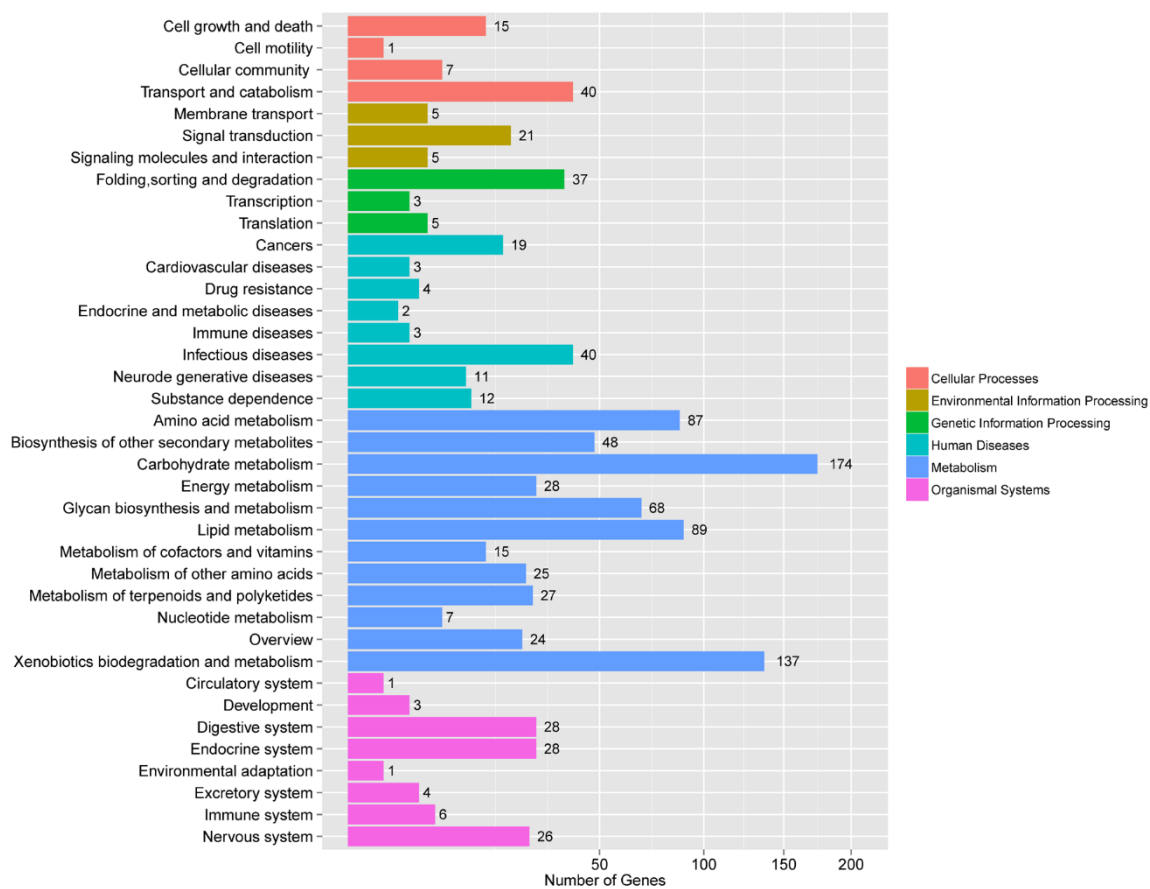

**Supplementary Figure S3.** Functional annotation of the secreted proteins of *T. pinophilus* 1-95 using the Kyoto Encyclopaedia of Genes and Genomes (KEGG) database.

**Supplementary Table S1.** Comparison analysis of genome features among *T. pinophilus* 1-95 and another 10 filamentous fungi producing biomass degrading enzymes.

| Strains                                 | Genome size (Mb) | Protein Number* | GC (%) | Data Resource   |
|-----------------------------------------|------------------|-----------------|--------|-----------------|
| <i>T. pinophilu</i> 1-95                | 36.51            | 13472           | 50.60  | This study      |
| <i>Aspergillus nidulans</i> FGSC A4     | 30.24            | 9541            | 50.32  | GCF_000149205.1 |
| <i>A. oryzae</i> 3.042                  | 36.57            | 11321           | 48.32  | GCA_000269785.2 |
| <i>A. niger</i> CBS 513.88              | 34.00            | 10503           | 50.35  | GCF_000002855.3 |
| <i>Penicillium chrysogenum</i> P2niaD18 | 32.52            | 11090           | 48.95  | GCA_000710275.1 |
| <i>P. oxalicum</i> HP7-1                | 30.65            | 9834            | 50.65  | GCA_001723175.1 |
| <i>T. marneffe</i> ATCC 18224           | 28.64            | 10002           | 46.67  | GCF_000001985.1 |
| <i>T. stipitatus</i> ATCC 10500         | 35.68            | 12442           | 46.07  | GCF_000003125.1 |
| <i>T. cellulolyticus</i> Y-94           | 36.40            | 10867           | 46.63  | GCA_000829775.1 |
| <i>Trichoderma reesei</i> QM6a          | 33.9             | 9120            | 52.82  | GCF_000167675.1 |
| <i>Neurospora crassa</i> OR74A          | 41.10            | 9,907           | 48.23  | GCF_000182925.2 |

\*indicates that the number of genes is obtained through Perl script parsing GBK format.

**Supplementary Table S2.** Assessment analysis of *T. pinophilus* 1-95 genome by software CEGMA and BUSCO.

| Strain                        | CEGMA                          |                              |                            |                         |                | BUSCO                           |                              |                            |                               |                              |                            |
|-------------------------------|--------------------------------|------------------------------|----------------------------|-------------------------|----------------|---------------------------------|------------------------------|----------------------------|-------------------------------|------------------------------|----------------------------|
|                               | Genome assembly<br>(248 genes) |                              |                            | Gene Set<br>(437 genes) |                | Genome Assembly<br>(1438 genes) |                              |                            | Gene Set<br>(1438 genes)      |                              |                            |
|                               | Complete<br>matching<br>genes  | Partial<br>matching<br>genes | Matching<br>percent<br>(%) | Overlap<br>genes        | Percent<br>(%) | Complete<br>matching<br>genes   | Partial<br>matching<br>genes | Matching<br>percent<br>(%) | Complete<br>matching<br>genes | Partial<br>matching<br>genes | Matching<br>percent<br>(%) |
| <i>T. pinophilus</i> 1-95     | 238                            | 5                            | 97.98                      | 427                     | 97.71          | 1419                            | 15                           | 98.67                      | 1431                          | 6                            | 99.51                      |
| <i>T. cellulolyticus</i> Y-94 | 233                            | 7                            | 96.77                      | 383                     | 88.45          | 1411                            | 18                           | 98.12                      | 1383                          | 39                           | 96.17                      |



**Supplementary Table S3.** Comparative analysis of homologous proteins among *T. pinophilus* 1-95 and another 10 filamentous fungi producing biomass degrading enzymes.

| Species                       | <i>Aspergillus<br/>nidulans</i><br>FGSC A4 | <i>A. niger</i><br>CBS<br>513.88 | <i>A. oryzae</i><br>3.042 | <i>Neurospora<br/>crassa</i><br>OR74a | <i>Penicillium<br/>chrysogenum</i><br>P2niaD18 | <i>P. oxalicum</i><br>HP7-1 | <i>T. marneffei</i><br>ATCC<br>18224 | <i>T. stipitatus</i><br>ATCC<br>10500 | <i>T. cellulolyticus</i><br>Y-94 | <i>Trichoderma<br/>reesei</i><br>QM6a |
|-------------------------------|--------------------------------------------|----------------------------------|---------------------------|---------------------------------------|------------------------------------------------|-----------------------------|--------------------------------------|---------------------------------------|----------------------------------|---------------------------------------|
| Number of homologous proteins | 3119                                       | 3824                             | 3599                      | 1407                                  | 3378                                           | 3520                        | 8342                                 | 8098                                  | 10260                            | 1626                                  |
| Average identity (%)          | 72.7                                       | 73                               | 72.7                      | 71.33                                 | 72.66                                          | 72.43                       | 88.23                                | 84.29                                 | 98.28                            | 70.922                                |

**Supplementary Table S4.** Paired-end (PE) libraries with average insert sizes 500 bp mapped the whole genome sequence of *Talaromyces cellulolyticus* Y-94.

| <b>ChrID</b> | <b>Reference size (bp)</b> | <b>Covered length (bp)</b> | <b>Coverage (%)</b> | <b>Depth</b> |
|--------------|----------------------------|----------------------------|---------------------|--------------|
| DF933797     | 16189                      | 132                        | 0.82                | 9.5          |
| DF933798     | 7171                       | 0                          | 0                   | 0            |
| DF933799     | 249371                     | 233300                     | 93.56               | 91           |
| DF933800     | 543574                     | 476104                     | 87.59               | 78           |
| DF933801     | 7505                       | 0                          | 0                   | 0            |
| DF933802     | 3566                       | 0                          | 0                   | 0            |
| DF933803     | 14379                      | 134                        | 0.93                | 85           |
| DF933804     | 4507                       | 0                          | 0                   | 0            |
| DF933805     | 5272                       | 4854                       | 92.07               | 500          |
| DF933806     | 8137                       | 0                          | 0                   | 0            |
| DF933807     | 726475                     | 625158                     | 86.05               | 83           |
| DF933808     | 9682                       | 0                          | 0                   | 0            |
| DF933809     | 1090089                    | 955490                     | 87.65               | 83           |
| DF933810     | 23213                      | 0                          | 0                   | 0            |
| DF933811     | 3494755                    | 3243615                    | 92.81               | 84           |
| DF933812     | 52934                      | 141                        | 0.27                | 26           |
| DF933813     | 2643372                    | 2503190                    | 94.7                | 85           |
| DF933814     | 2887201                    | 2697584                    | 93.43               | 86           |
| DF933815     | 3210                       | 0                          | 0                   | 0            |
| DF933816     | 4047                       | 125                        | 3.09                | 1            |
| DF933817     | 9580                       | 0                          | 0                   | 0            |
| DF933818     | 1336228                    | 1156154                    | 86.52               | 86           |
| DF933819     | 571201                     | 510571                     | 89.39               | 88           |
| DF933820     | 1071518                    | 994881                     | 92.85               | 84           |
| DF933821     | 3550                       | 0                          | 0                   | 0            |
| DF933822     | 22512                      | 8184                       | 36.35               | 91           |
| DF933823     | 3934                       | 0                          | 0                   | 0            |
| DF933824     | 31772                      | 4145                       | 13.05               | 310          |
| DF933825     | 46236                      | 318                        | 0.69                | 1.6          |
| DF933826     | 15853                      | 141                        | 0.89                | 11           |
| DF933827     | 2017                       | 0                          | 0                   | 0            |
| DF933828     | 2333                       | 2260                       | 96.87               | 73           |
| DF933829     | 3612999                    | 3170374                    | 87.75               | 84           |
| DF933830     | 4195530                    | 3952279                    | 94.2                | 86           |
| DF933831     | 4609                       | 0                          | 0                   | 0            |
| DF933832     | 4347                       | 0                          | 0                   | 0            |
| DF933833     | 2041                       | 2035                       | 99.71               | 70           |
| DF933834     | 826585                     | 749013                     | 90.62               | 80           |

|              |                 |                 |              |           |
|--------------|-----------------|-----------------|--------------|-----------|
| DF933835     | 1358518         | 1166859         | 85.89        | 83        |
| DF933836     | 2056            | 0               | 0            | 0         |
| DF933837     | 1279461         | 1122105         | 87.7         | 84        |
| DF933838     | 2486755         | 2269975         | 91.28        | 86        |
| DF933839     | 969434          | 819449          | 84.53        | 84        |
| DF933840     | 3189086         | 2579602         | 80.89        | 81        |
| DF933841     | 5308            | 0               | 0            | 0         |
| DF933842     | 17731           | 0               | 0            | 0         |
| DF933843     | 844840          | 668455          | 79.12        | 84        |
| DF933844     | 9262            | 243             | 2.62         | 12        |
| DF933845     | 7524            | 0               | 0            | 0         |
| DF933846     | 577942          | 480141          | 83.08        | 81        |
| DF933847     | 42575           | 0               | 0            | 0         |
| DF933848     | 10449           | 0               | 0            | 0         |
| DF933849     | 6082            | 0               | 0            | 0         |
| DF933850     | 10834           | 0               | 0            | 0         |
| DF933851     | 18859           | 0               | 0            | 0         |
| DF933852     | 61417           | 161             | 0.26         | 4.7       |
| DF933853     | 9072            | 0               | 0            | 0         |
| DF933854     | 20907           | 274             | 1.31         | 190       |
| DF933855     | 3406            | 0               | 0            | 0         |
| DF933856     | 1913789         | 1661084         | 86.8         | 80        |
| <b>Total</b> | <b>36402801</b> | <b>32058530</b> | <b>88.07</b> | <b>83</b> |

**Supplementary Table S5.** Comparison of plant cell wall degrading enzymes (CWDEs) among *T. pinophilus* 1-95, *T. cellulolyticus* Y-94 and *Penicillium oxalicum* HP7-1.

| Enzyme                                         | EC Number      | CAZy Family | <i>T. pinophilus</i> 1-95 | <i>T. cellulolyticus</i> Y-94 | <i>P. oxalicum</i> HP7-1 |          |
|------------------------------------------------|----------------|-------------|---------------------------|-------------------------------|--------------------------|----------|
| <b>1. Cellulose-degrading enzymes</b>          |                |             |                           |                               |                          |          |
| Cellobiohydrolase                              | 3.2.1.91       | GH6         | TP08389                   |                               | POX04786                 |          |
|                                                |                |             |                           |                               |                          |          |
|                                                |                | GH7         | TP09412                   | TCE0_004r00180                | POX02490                 |          |
|                                                |                |             |                           |                               | POX05587                 |          |
| $\beta$ -1,4-endoglucanase                     | 3.2.1.4        | GH5         | TP13457                   | TCE0_013f01292                | POX01166                 |          |
|                                                |                |             | TP04686                   | TCE0_017r03786                | POX01896                 |          |
|                                                |                |             | TP08784                   | TCE0_024f07747                | POX02740                 |          |
|                                                |                |             | TP07499                   | TCE0_033r09253                | POX04137                 |          |
|                                                |                |             |                           |                               | POX06147                 |          |
|                                                |                | GH7         |                           |                               | POX01206                 |          |
|                                                |                |             | TP08514                   | TCE0_024r07350                | POX05571                 |          |
|                                                |                |             | GH12                      | TP10877                       | TCE0_042r14939           | POX06983 |
|                                                |                |             |                           |                               |                          | POX07535 |
|                                                |                |             | GH45                      | TP06957                       | TCE0_023r07056           | POX05570 |
| TP08136                                        | TCE0_033r08342 |             |                           |                               |                          |          |
| Xyloglucan-specific $\beta$ -1,4-endoglucanase | 3.2.1.151      | GH12        | TP02720                   | TCE0_015f02847                | POX00963                 |          |
| $\beta$ -1,3(4)-endoglucanase                  | 3.2.1.6        | GH16        | TP07888                   | TCE0_033r08690                | POX06959                 |          |
|                                                |                |             |                           |                               | POX00652                 |          |
| Lytic polysaccharide monooxygenases            | (LPMOs)        | AA9         | TP03971                   | TCE0_044r17407                | POX02308                 |          |
|                                                |                |             |                           |                               | POX05968                 |          |
|                                                |                |             |                           |                               | POX08897                 |          |

|                      |                |     |         |                |          |
|----------------------|----------------|-----|---------|----------------|----------|
|                      |                |     |         |                | POX09256 |
| $\beta$ -glucosidase | 3.2.1.21       | GH1 | TP02423 | TCE0_015r02411 | POX01473 |
|                      |                |     | TP04716 | TCE0_017r03738 | POX03062 |
|                      |                |     | TP05374 | TCE0_018f05835 | POX06079 |
|                      |                |     | TP07549 | TCE0_033f09178 | POX08882 |
|                      |                |     | TP11889 | TCE0_060r18631 |          |
|                      |                |     |         |                |          |
|                      |                | GH3 | TP09603 | TCE0_011f00448 | POX00968 |
|                      |                |     | TP02587 | TCE0_015f02654 | POX01646 |
|                      |                |     | TP02719 | TCE0_015r02845 | POX03641 |
|                      |                |     | TP06044 | TCE0_018f04835 | POX04358 |
|                      |                |     | TP06188 | TCE0_018r04615 | POX06835 |
|                      |                |     | TP05820 | TCE0_018r05172 | POX07963 |
|                      |                |     | TP08794 | TCE0_024f07765 | POX08491 |
|                      |                |     | TP08074 | TCE0_033f08430 | POX08984 |
|                      |                |     | TP08367 | TCE0_033r08027 |          |
|                      |                |     | TP07983 | TCE0_033r08553 |          |
|                      |                |     | TP07716 | TCE0_033r08939 |          |
|                      |                |     | TP01149 | TCE0_034f10525 |          |
|                      |                |     | TP00302 | TCE0_034f11821 |          |
|                      |                |     | TP09042 | TCE0_039f12945 |          |
|                      |                |     | TP12437 | TCE0_041f14010 |          |
|                      |                |     | TP03558 | TCE0_044f16774 |          |
|                      |                |     | TP13061 | TCE0_050r18181 |          |
| TP00267              | TCE0_004r00287 |     |         |                |          |
| TP03577              | TCE0_038f12659 |     |         |                |          |
| TP06192              |                |     |         |                |          |

|                                           |          |         |         |                |          |
|-------------------------------------------|----------|---------|---------|----------------|----------|
|                                           |          |         | TP07981 |                |          |
|                                           |          |         | TP11082 |                |          |
|                                           |          |         | TP12325 |                |          |
|                                           |          |         | TP12326 |                |          |
| <b>2. Hemicellulose-degrading enzymes</b> |          |         |         |                |          |
| $\alpha$ -galactosidase                   | 3.2.1.22 | GH27    | TP02736 | TCE0_015f02871 | POX04444 |
|                                           |          |         | TP02523 | TCE0_015r02550 | POX09085 |
|                                           |          |         | TP02903 | TCE0_015r03131 |          |
|                                           |          |         | TP05656 | TCE0_018f05406 |          |
|                                           |          | GH36    | TP09250 | TCE0_039f13249 |          |
|                                           |          |         | TP06873 | TCE0_047f17698 |          |
|                                           |          |         | TP13280 | TCE0_013f01052 |          |
|                                           |          | TP13282 |         |                |          |
| $\beta$ -1,4-endoxylnase                  | 3.2.1.8  | GH10    | TP06900 | TCE0_023r06982 | POX05916 |
|                                           |          |         |         |                | POX08990 |
|                                           |          |         |         |                | POX00063 |
|                                           |          | GH11    | TP01904 | TCE0_015f01698 | POX01417 |
|                                           |          |         | TP02919 | TCE0_015r03151 | POX02723 |
|                                           |          |         | TP09889 | TCE0_022f06941 | POX03430 |
|                                           |          |         | TP09024 | TCE0_039r12923 | POX06783 |
|                                           |          |         | TP12816 | TCE0_041r13448 | POX08484 |
|                                           |          |         | TP11225 | TCE0_042f15439 |          |
|                                           |          |         | TP09858 |                |          |
|                                           |          | TP00436 |         |                |          |
|                                           |          | GH30    |         |                | POX04274 |
|                                           |          |         |         |                | POX06601 |
| $\beta$ -D-xylosidase                     | 3.2.1.37 | GH3     | TP05314 | TCE0_018r05917 | POX00007 |

|                                   |          |                                 |                |                |                |                |          |
|-----------------------------------|----------|---------------------------------|----------------|----------------|----------------|----------------|----------|
|                                   |          |                                 | TP03218        | TCE0_044f16290 | POX06571       |                |          |
|                                   |          |                                 | TP12892        | TCE0_050r18425 |                |                |          |
|                                   |          |                                 | TP07586        |                |                |                |          |
|                                   |          | GH43                            |                | TP13153        | TCE0_013r00881 | POX04995       |          |
|                                   |          |                                 |                | TP13258        | TCE0_013r01023 | POX08661       |          |
|                                   |          |                                 |                | TP02218        | TCE0_015r02141 | POX00006       |          |
|                                   |          |                                 |                | TP02739        | TCE0_015r02874 | POX01744       |          |
|                                   |          |                                 |                | TP06762        | TCE0_047f17875 |                |          |
|                                   |          |                                 | TP09672        |                |                |                |          |
|                                   |          | $\alpha$ -L-arabinofuranosidase | 3.2.1.55       | GH43           | TP02524        | TCE0_015r02553 | POX05240 |
|                                   |          |                                 |                |                |                |                | POX06600 |
|                                   |          |                                 |                |                | POX07665       |                |          |
|                                   |          |                                 |                |                | POX07891       |                |          |
| GH51                              | TP13092  |                                 |                | TCE0_013f00789 | POX04752       |                |          |
|                                   | TP05618  |                                 |                | TCE0_018r05464 | POX06355       |                |          |
|                                   | TP10566  |                                 |                | TCE0_042f14472 | POX07441       |                |          |
| GH54                              | TP09805  |                                 |                | TCE0_011f00699 | POX01914       |                |          |
|                                   | TP13333  |                                 |                | TCE0_013f01127 |                |                |          |
|                                   | TP02487  |                                 |                | TCE0_015r02500 |                |                |          |
|                                   | TP01576  |                                 |                | TCE0_034f09917 |                |                |          |
|                                   | TP04108  |                                 |                | TCE0_044r17624 |                |                |          |
| GH62                              | TP08906  |                                 |                | TCE0_039f12752 | POX05540       |                |          |
|                                   | TP01905  |                                 |                | TCE0_015r01700 | POX06599       |                |          |
|                                   | TP03986  |                                 |                | TCE0_044f17429 |                |                |          |
| $\alpha$ -1,5-L-endoarabinosidase | 3.2.1.99 |                                 |                | GH43           | TP02913        |                | POX00923 |
|                                   |          |                                 |                |                | TP12748        |                | POX01921 |
|                                   |          | TP13291                         | TCE0_013f01067 |                | POX08140       |                |          |

|                                |           |      |         |                |          |
|--------------------------------|-----------|------|---------|----------------|----------|
|                                |           |      |         |                | POX09154 |
| $\beta$ -mannosidase           | 3.2.1.25  | GH2  | TP08661 | TCE0_024f07565 | POX00759 |
|                                |           |      | TP01384 | TCE0_034f10187 | POX01961 |
|                                |           |      | TP10485 | TCE0_042f14333 |          |
|                                |           |      | TP03542 | TCE0_044f16757 |          |
|                                |           |      | TP03563 | TCE0_044r16782 |          |
|                                |           |      | TP06860 | TCE0_047f17717 |          |
| $\beta$ -1,4-endomannanase     | 3.2.1.78  | GH5  | TP13093 | TCE0_013f00791 | POX01937 |
|                                |           |      | TP12746 |                | POX07285 |
|                                |           | GH26 |         |                | POX07536 |
| $\alpha$ -1,5-L-exoarabinanase | 3.2.1.-   | GH93 | TP05094 | TCE0_017r03210 | POX00008 |
|                                |           |      | TP13027 | TCE0_050f18245 | POX01274 |
|                                |           |      | TP12891 | TCE0_050r18426 | POX03420 |
|                                |           |      | TP09758 |                |          |
| $\beta$ -1,4-endogalactosidase | 3.2.1.89  | GH53 | TP12454 | TCE0_041r13985 | POX06689 |
| $\alpha$ -glucosiduronase      | 3.2.1.139 | GH67 |         |                | POX04275 |
| $\alpha$ -L-fucosidase         | 3.2.1.51  | GH29 | TP00303 | TCE0_034f11818 |          |
|                                |           |      | TP00306 | TCE0_034r11813 |          |
|                                |           |      | TP11718 | TCE0_060f18889 |          |
|                                |           |      | TP03070 |                |          |
|                                |           | GH95 | TP04936 | TCE0_017r03422 | POX03063 |
|                                |           |      | TP07066 | TCE0_023r07212 |          |
|                                |           |      | TP06680 | TCE0_047r18022 |          |
|                                |           |      | TP07550 |                |          |
| TP12218                        |           |      |         |                |          |
| Polygalacturonase              | 3.2.1.15  | GH28 | TP08437 | TCE0_033f07936 | POX03447 |
|                                |           |      | TP03527 | TCE0_044f16730 | POX03730 |



|                                                 |           |       |         |                |          |
|-------------------------------------------------|-----------|-------|---------|----------------|----------|
|                                                 |           |       | TP05070 |                | POX04815 |
|                                                 |           |       |         |                | POX07304 |
|                                                 |           |       |         |                | POX04570 |
|                                                 |           |       |         |                | POX06790 |
|                                                 |           |       |         |                | POX08286 |
|                                                 |           |       |         |                | POX05580 |
| Rhamnogalacturonan hydrolase                    | 3.2.1.171 | GH28  | TP08427 | TCE0_033r07948 | POX02024 |
|                                                 |           |       | TP00731 | TCE0_034f11163 | POX04377 |
|                                                 |           |       | TP09251 | TCE0_039f13250 | POX01225 |
|                                                 |           |       | TP07985 |                |          |
| D-4,5-unsaturated $\beta$ -glucuronyl hydrolase | 3.2.1.-   | GH88  |         |                | POX06998 |
| Unsaturated rhamnogalacturonyl hydrolase        | 3.2.1.172 | GH105 | TP05718 | TCE0_018r05318 | POX08875 |
|                                                 |           |       | TP08386 | TCE0_033f08000 |          |
|                                                 |           |       | TP00966 | TCE0_034f10811 |          |
|                                                 |           |       | TP03027 | TCE0_044r16075 |          |
| Rhamnogalacturonan acetylerase                  | 3.1.1.86  | CE12  | TP11874 | TCE0_060f18653 | POX08476 |
|                                                 |           |       |         |                | POX07373 |
| Acetyl xylan esterase                           | 3.1.1.72  | CE1   | TP02522 | TCE0_015f02549 | POX01218 |
|                                                 |           |       | TP02906 | TCE0_015r03136 |          |
|                                                 |           | CE2   | TP06763 | TCE0_047r17873 | POX08861 |
|                                                 |           |       | TP06741 | TCE0_047r17910 |          |
|                                                 |           | CE3   | TP09379 | TCE0_004r00149 |          |
|                                                 |           |       | TP02707 | TCE0_015r02825 |          |
|                                                 |           |       | TP00301 | TCE0_034r11823 |          |
|                                                 |           |       | TP03042 | TCE0_043r15518 |          |
|                                                 |           |       | TP03145 | TCE0_044r16257 |          |
|                                                 |           |       | TP03124 |                |          |

|                                    |          |              |         |                |          |
|------------------------------------|----------|--------------|---------|----------------|----------|
|                                    |          |              | TP12334 |                |          |
|                                    |          | CE5          | TP08046 | TCE0_033f08462 | POX03711 |
|                                    |          |              | TP11188 |                |          |
| Feruloyl esterase                  | 3.1.1.73 | CE1          |         |                | POX00197 |
|                                    |          |              |         |                | POX09137 |
|                                    |          | Not assigned | TP13158 | TCE0_013r00888 | POX00727 |
|                                    |          |              | TP02893 | TCE0_015r03115 | POX01117 |
|                                    |          |              | TP04811 | TCE0_017r03600 | POX00668 |
|                                    |          |              | TP10531 | TCE0_042f14421 |          |
|                                    |          |              | TP03050 |                |          |
| TP03068                            |          |              |         |                |          |
| TP11085                            |          |              |         |                |          |
| SUN family beta-glucosidase        | 3.2.1.-  | GH132        | TP08555 | TCE0_024f07410 | POX01158 |
|                                    |          |              |         |                | POX06380 |
| <b>3. Pectin-degrading enzymes</b> |          |              |         |                |          |
| Pectinesterase                     | 3.1.1.11 | CE8          | TP09742 | TCE0_011f00620 | POX07932 |
|                                    |          |              | TP02150 | TCE0_015f02043 | POX08067 |
|                                    |          |              | TP06538 | TCE0_038r12590 | POX00760 |
|                                    |          |              |         |                |          |
| Tannase                            | 3.1.1.20 | Not assigned | TP01788 | TCE0_015r01535 | POX00729 |
|                                    |          |              | TP05371 | TCE0_018r05839 | POX08434 |
|                                    |          |              | TP08907 | TCE0_039r12754 |          |
| Pectin lyase                       | 4.2.2.10 | PL1          | TP12683 | TCE0_041f13655 | POX04920 |
|                                    |          |              | TP03086 | TCE0_044r16137 | POX09802 |
| Pectate lyase                      | 4.2.2.2  | PL1          | TP08387 | TCE0_033f07999 | POX07890 |
|                                    |          |              | TP13347 | TCE0_013f01148 |          |
| Rhamnogalacturonan endolyase       | 4.2.2.23 | PL4          |         |                | POX05310 |

|                                       |           |              |         |                |          |
|---------------------------------------|-----------|--------------|---------|----------------|----------|
|                                       |           |              |         |                | POX06611 |
|                                       |           |              |         |                | POX08785 |
| L-threo-3-deoxy-hexylosonate aldolase | 4.1.2.54  | Not assigned | TP01081 | TCE0_034f10618 | POX02774 |
|                                       |           |              | TP11196 | TCE0_042r15394 | POX07471 |
|                                       |           |              | TP13055 | TCE0_050f18191 |          |
| L-galactonate dehydratase             | 4.2.1.146 | Not assigned | TP05823 | TCE0_018f05169 | POX04114 |
|                                       |           |              | TP07065 | TCE0_023f07210 |          |
|                                       |           |              | TP06402 | TCE0_038r12406 |          |
|                                       |           |              | TP06446 | TCE0_038r12473 |          |

**Supplementary Table S6.** Comparison of starch degrading enzymes among *T. pinophilus* 1-95 and another 10 filamentous fungi producing biomass degrading enzymes.

| Protein Name                           | EC Number | <i>T. pinophilus</i> 1-95 | <i>Aspergillus nidulans</i> FGSC A4 | <i>A. niger</i> CBS 513.88 | <i>A. oryzae</i> 3.042 | <i>Neurospora crassa</i> OR74A | <i>T. cellulolyticus</i> Y-94 | <i>T. marneffei</i> ATCC 18224 | <i>T. stipitatus</i> ATCC 10500 | <i>Trichoderma reesei</i> QM6a | <i>Penicillium chrysogenum</i> P2niaD18 | <i>P. oxalicum</i> HP7-1 |
|----------------------------------------|-----------|---------------------------|-------------------------------------|----------------------------|------------------------|--------------------------------|-------------------------------|--------------------------------|---------------------------------|--------------------------------|-----------------------------------------|--------------------------|
| $\alpha$ -amylase                      | 3.2.1.1   | TP03368                   | AN2018.2                            | ANI_1_1100184              | Ao3042_01517           | NCU05873                       | TCE0_033r09409                | PMAA_058260                    | TSTA_013540                     | TRIREDRAFT_105956              | EN45_014170                             | POX03230                 |
|                                        |           | TP03580                   | AN3308.2                            | ANI_1_1284084              | Ao3042_01518           | NCU08131                       | TCE0_039f13307                | PMAA_063250                    | TSTA_044280                     |                                | EN45_045100                             | POX03231                 |
|                                        |           | TP04014                   | AN3309.2                            | ANI_1_1524104              | Ao3042_03622           | NCU09486                       | TCE0_044f16809                | PMAA_064990                    | TSTA_082630                     |                                | EN45_073300                             | POX09352                 |
|                                        |           | TP07411                   | AN3388.2                            | ANI_1_1810134              | Ao3042_05212           | NCU09805                       | TCE0_044f17478                | PMAA_096850                    | TSTA_084740                     |                                | EN45_090540                             |                          |
|                                        |           | TP09288                   | AN3402.2                            | ANI_1_260044               |                        |                                | TCE0_044r16495                |                                | TSTA_089790                     |                                | EN45_090550                             |                          |
|                                        |           |                           | AN4507.2                            | ANI_1_3270014              |                        |                                |                               |                                |                                 |                                | EN45_105210                             |                          |
|                                        |           |                           | AN6324.2                            | ANI_1_362084               |                        |                                |                               |                                |                                 |                                | EN45_107900                             |                          |
|                                        |           |                           |                                     | ANI_1_460094               |                        |                                |                               |                                |                                 |                                | EN45_107910                             |                          |
|                                        |           | ANI_1_820104              |                                     |                            |                        |                                |                               |                                |                                 |                                |                                         |                          |
| Glucoamylase                           | 3.2.1.3   | TP04225                   | AN7402.2                            | ANI_1_820034               | Ao3042_08133           | NCU01517                       | TCE0_039r13271                | PMAA_096710                    | TSTA_044290                     | TRIREDRAFT_1885                | EN45_015780                             | POX01356                 |
|                                        |           | TP07482                   | AN8904.2                            |                            | Ao3042_10648           |                                | TCE0_039r13304                | PMAA_096840                    | TSTA_044610                     |                                | EN45_097990                             | POX02412                 |
|                                        |           | TP09267                   |                                     |                            |                        |                                | TCE0_043f15539                |                                | TSTA_106690                     |                                | EN45_105200                             | POX04642                 |
|                                        |           | TP09287                   |                                     |                            |                        |                                |                               |                                |                                 |                                |                                         |                          |
|                                        |           | TP12319                   |                                     |                            |                        |                                |                               |                                |                                 |                                |                                         |                          |
| 1,4- $\alpha$ -glucan branching enzyme | 2.4.1.18  | TP03995                   | AN2314.2                            | ANI_1_602124               | Ao3042_08360           | NCU05429                       | TCE0_044f17444                | PMAA_068370                    | TSTA_088790                     | TRIREDRAFT_123368              | EN45_072830                             | POX04938                 |
| $\alpha$ -glucosidase                  | 3.2.1.20  | TP09781                   | AN0941.2                            | ANI_1_1098184              | Ao3042_05838           | NCU02583                       | TCE0_011r00674                | PMAA_002150                    | TSTA_023890                     | TRIREDRAFT_59578               | EN45_014160                             | POX03452                 |
|                                        |           | TP11464                   | AN2017.2                            | ANI_1_1476014              | Ao3042_06557           | NCU04674                       | TCE0_018f06215                | PMAA_007280                    | TSTA_041120                     | TRIREDRAFT_82235               | EN45_050490                             | POX03741                 |
|                                        |           | TP12265                   | AN3516.2                            | ANI_1_1804024              | Ao3042_07614           | NCU06523                       | TCE0_034f12152                | PMAA_015950                    | TSTA_041820                     |                                | EN45_053200                             | POX03889                 |
|                                        |           | TP03913                   | AN4843.2                            | ANI_1_850114               | Ao3042_07671           | NCU07860                       | TCE0_034r10854                | PMAA_099560                    | TSTA_101210                     |                                | EN45_075930                             | POX06242                 |
|                                        |           | TP00071                   | AN7345.2                            |                            | Ao3042_10501           | NCU09281                       | TCE0_043r15609                |                                | TSTA_101220                     |                                | EN45_084270                             | POX06751                 |
|                                        |           | TP05786                   | AN8953.2                            |                            | Ao3042_10503           |                                | TCE0_044r16449                |                                | TSTA_106040                     |                                | EN45_084670                             |                          |

|  |  |         |  |  |              |  |                |  |             |  |             |  |
|--|--|---------|--|--|--------------|--|----------------|--|-------------|--|-------------|--|
|  |  | TP00293 |  |  | Ao3042_11801 |  | TCE0_044r17312 |  | TSTA_106170 |  | EN45_086140 |  |
|  |  | TP00938 |  |  |              |  | TCE0_060r19238 |  | TSTA_112550 |  | EN45_091760 |  |
|  |  | TP01354 |  |  |              |  |                |  |             |  | EN45_097770 |  |
|  |  | TP03337 |  |  |              |  |                |  |             |  |             |  |
|  |  | TP04013 |  |  |              |  |                |  |             |  |             |  |
|  |  | TP04937 |  |  |              |  |                |  |             |  |             |  |
|  |  | TP05120 |  |  |              |  |                |  |             |  |             |  |

**Supplementary Table S7.** The predicted secondary metabolism gene clusters in *T. pinophilus* 1-95 and the comparison analysis among with another 10 filamentous fungi producing biomass degrading enzymes.

| Cluster             | <i>T. pinophilus</i><br>1-95 | <i>T. cellulolyticus</i><br>Y-94 | <i>Penicillium</i><br><i>oxalicum</i><br>HP7-1 | <i>Neurospora</i><br><i>crassa</i><br>OR74A | <i>T. marneffei</i><br>ATCC<br>18224 | <i>T. stipitatus</i><br>ATCC 10500 | <i>Trichoderma</i><br><i>reesei</i><br>QM6a | <i>Aspergillus</i><br><i>nidulans</i><br>FGSC A4 | <i>A. niger</i><br>CBS<br>513.88 | <i>A. oryzae</i><br>3.042 | <i>P. chrysogenum</i><br>P2niaD18 |
|---------------------|------------------------------|----------------------------------|------------------------------------------------|---------------------------------------------|--------------------------------------|------------------------------------|---------------------------------------------|--------------------------------------------------|----------------------------------|---------------------------|-----------------------------------|
| Indole              | 0                            | 2                                | 2                                              | 1                                           | 0                                    | 0                                  | 0                                           | 4                                                | 2                                | 5                         | 0                                 |
| Indole-Nrps         | 0                            | 0                                | 0                                              | 0                                           | 1                                    | 0                                  | 0                                           | 0                                                | 0                                | 0                         | 1                                 |
| Lantipeptide        | 0                            | 0                                | 0                                              | 1                                           | 0                                    | 0                                  | 0                                           | 0                                                | 0                                | 0                         | 0                                 |
| Nrps                | 9                            | 9                                | 12                                             | 3                                           | 7                                    | 9                                  | 6                                           | 10                                               | 15                               | 12                        | 8                                 |
| Nrps-Indole         | 0                            | 0                                | 1                                              | 0                                           | 0                                    | 0                                  | 0                                           | 1                                                | 0                                | 1                         | 0                                 |
| Nrps-T1pks          | 2                            | 2                                | 3                                              | 0                                           | 3                                    | 3                                  | 4                                           | 2                                                | 8                                | 2                         | 3                                 |
| Nrps-Terpene        | 0                            | 0                                | 0                                              | 0                                           | 0                                    | 1                                  | 0                                           | 0                                                | 0                                | 0                         | 0                                 |
| Other               | 16                           | 15                               | 11                                             | 3                                           | 12                                   | 9                                  | 5                                           | 9                                                | 13                               | 13                        | 15                                |
| Phosphonate         | 1                            | 1                                | 0                                              | 0                                           | 0                                    | 0                                  | 0                                           | 0                                                | 0                                | 0                         | 0                                 |
| Siderophore         | 0                            | 0                                | 1                                              | 0                                           | 0                                    | 0                                  | 0                                           | 0                                                | 2                                | 1                         | 1                                 |
| T1pks               | 28                           | 28                               | 5                                              | 7                                           | 16                                   | 30                                 | 9                                           | 22                                               | 27                               | 22                        | 18                                |
| T1pks-Indole        | 1                            | 1                                | 0                                              | 0                                           | 1                                    | 0                                  | 0                                           | 0                                                | 0                                | 1                         | 0                                 |
| T1pks-Nrps          | 1                            | 0                                | 1                                              | 0                                           | 1                                    | 3                                  | 0                                           | 0                                                | 2                                | 0                         | 0                                 |
| T3pks               | 0                            | 0                                | 1                                              | 1                                           | 0                                    | 0                                  | 0                                           | 0                                                | 1                                | 3                         | 1                                 |
| Terpene             | 9                            | 7                                | 7                                              | 3                                           | 7                                    | 7                                  | 6                                           | 7                                                | 14                               | 11                        | 7                                 |
| Terpene-Nrps        | 0                            | 0                                | 0                                              | 0                                           | 0                                    | 0                                  | 0                                           | 0                                                | 0                                | 1                         | 1                                 |
| Terpene-Nrps-Indole | 0                            | 0                                | 1                                              | 0                                           | 0                                    | 0                                  | 0                                           | 0                                                | 0                                | 0                         | 0                                 |
| Terpene-T1pks       | 1                            | 1                                | 0                                              | 0                                           | 0                                    | 0                                  | 0                                           | 0                                                | 0                                | 0                         | 0                                 |
| <b>Total</b>        | <b>68</b>                    | <b>66</b>                        | <b>45</b>                                      | <b>19</b>                                   | <b>48</b>                            | <b>62</b>                          | <b>30</b>                                   | <b>55</b>                                        | <b>84</b>                        | <b>72</b>                 | <b>55</b>                         |
